# Supplementary material
Source: ML conference proceedings conference paper supplement (https://proceedings.mlr.press/v115/avati20a.html)
Supplement: Supplementary file 1 [file avati20a-supp.pdf]

## APPENDIX

### A. INTEGRAL IDENTITIES

Let  $\Phi_{\mu,\sigma^2}(z)$  be the CDF of a Gaussian distribution with mean  $\mu$  and variance  $\sigma^2$ . Hence  $\Phi_{\mu,\sigma^2}(\log z)$  is the CDF of a log-normal distribution with mean  $\mu$  and variance  $\sigma^2$ . For some integer  $K$  (typically 32 in our experiments), we define  $I$  to be the following integral, approximated by the trapezoidal rule:

$$\begin{aligned} I_{\mu,\sigma^2}(y, g) &= \int_0^y \Phi_{\mu,\sigma^2}(\log z)^2 g(z) dz \\ &\approx \sum_{k=0}^{K-1} \frac{1}{2} \left[ \Phi_{\mu,\sigma^2}(\log z_{k+1})^2 g(z_{k+1}) + \Phi_{\mu,\sigma^2}(\log z_k)^2 g(z_k) \right] (z_{k+1} - z_k) \end{aligned}$$

where  $0 = z_0 < z_1 < \dots < z_K = y$  and  $g$  is a function. We further define

$$\begin{aligned} I_{\mu,\sigma^2}^+(y) &= I_{\mu,\sigma^2}(y, z \mapsto z), \\ I_{\mu,\sigma^2}^-(y) &= I_{-\mu,\sigma^2}(1/y, z \mapsto 1/z^2). \end{aligned}$$

### B. SURVIVAL-CRPS FOR LOG-NORMAL (RIGHT-CENSORED)

For a general continuous prediction distribution  $F$ , with actual time to outcome  $y \in \mathbb{R}_+$ , and censoring indicator  $c$ , we generalize the CRPS to the Right Censored Survival CRPS score as:

$$\begin{aligned} \mathcal{S}_{\text{CRPS-RIGHT}}(F, (y, c)) &= \int_{-\infty}^{\infty} (F(z) \mathbb{1}\{z \leq \log y \cup c = 0\} - \mathbb{1}\{z \geq \log y \cap c = 0\})^2 dz \\ &= \int_{-\infty}^{\bar{y}} F(z)^2 dz + (1-c) \int_{\bar{y}}^{\infty} (F(z) - 1)^2 dz. \end{aligned}$$

In the above expression  $F$  would generally be in the family of continuous distributions over the entire real line (eg. Gaussian). Alternately, one could also use a family of distributions over the positive reals (e.g log-normal), in which case the Survival CRPS becomes:

$$\begin{aligned} \mathcal{S}_{\text{CRPS-RIGHT}}(F, (y, c)) &= \int_0^{\infty} (F(z) \mathbb{1}\{z \leq y \cup c = 0\} - \mathbb{1}\{z \geq y \cap c = 0\})^2 dz \\ &= \int_0^y F(z)^2 dz + (1-c) \int_y^{\infty} (F(z) - 1)^2 dz. \end{aligned}$$

For the case of  $F$  being log-normal, the expression becomes

$$\begin{aligned} \mathcal{S}_{\text{CRPS-RIGHT}}(F_{\text{LN}(\mu,\sigma^2)}, (y, c)) &= \int_0^y \Phi_{\mu,\sigma^2}(\log z)^2 dz + (1-c) \int_y^{\infty} (1 - \Phi_{\mu,\sigma^2}(\log z))^2 dz \\ &= \int_0^y \Phi_{\mu,\sigma^2}(\log z)^2 dz + (1-c) \int_y^{\infty} \Phi_{-\mu,\sigma^2}(-\log z)^2 dz \\ &= \int_0^y \Phi_{\mu,\sigma^2}(\log z)^2 dz + (1-c) \int_0^{1/y} \Phi_{-\mu,\sigma^2}(\log z)^2 (1/z)^2 dz \\ &= I_{\mu,\sigma^2}^+(y) + (1-c) I_{\mu,\sigma^2}^-(y). \end{aligned}$$

### C. SURVIVAL-CRPS FOR LOG-NORMAL (INTERVAL-CENSORED)

We further extend the Right Censored Survival CRPS to the case of interval censoring. This is particularly useful for all-cause mortality prediction where we assume a particular event must occur by time  $\mathcal{T}$ . Using the same notations as before, the Interval Censored Survival CRPS is:

$$\mathcal{S}_{\text{CRPS-INTVL}}(F, (y, c, \mathcal{T})) = \int_0^{\infty} (F(z) \mathbb{1}\{z \leq y \cup c = 0\} \cup z \geq \mathcal{T} - \mathbb{1}\{z \geq y \cap c = 0\} \cup z \geq \mathcal{T})^2 dz$$

$$= \int_0^y F(z)^2 dz + (1-c) \int_y^{\mathcal{T}} (F(z)-1)^2 dz + \int_{\mathcal{T}}^{\infty} (F(z)-1)^2 dz.$$

For the case of  $F$  being log-normal, the expression becomes

$$\begin{aligned} \mathcal{S}_{\text{CRPS-INTVL}}(F_{\text{LN}(\mu, \sigma^2)}, (y, c, \mathcal{T})) &= \int_0^y \Phi_{\mu, \sigma^2}(\log z)^2 dz + (1-c) \int_y^{\mathcal{T}} (1 - \Phi_{\mu, \sigma^2}(\log z))^2 dz \\ &\quad + \int_{\mathcal{T}}^{\infty} (1 - \Phi_{\mu, \sigma^2}(\log z))^2 dz \\ &= \int_0^y \Phi_{\mu, \sigma^2}(\log z)^2 dz + (1-c) \int_{1/\mathcal{T}}^{1/y} \Phi_{-\mu, \sigma^2}(\log z)^2 (1/z)^2 dz \\ &\quad + \int_0^{1/\mathcal{T}} \Phi_{-\mu, \sigma^2}(\log z)^2 (1/z)^2 dz \\ &= I_{\mu, \sigma^2}^+(y) + I_{\mu, \sigma^2}^-(\mathcal{T}) + (1-c) \left[ I_{\mu, \sigma^2}^-(y) - I_{\mu, \sigma^2}^-(\mathcal{T}) \right]. \end{aligned}$$

#### D. SURVIVAL-AUPRC FOR LOG-NORMAL (INTERVAL-CENSORED)

We start with the most general case (interval censoring). For a general continuous prediction distribution  $F$  with an interval outcome  $[L, U]$ , we define the Survival-AUPRC as

$$\text{Survival-AUPRC}(F, L, U) = \int_0^1 [F(U/t) - F(Lt)] dt.$$

Specifically for the case of log-normal, where  $\phi$  and  $\Phi$  are PDF and CDF of  $\mathcal{N}(0, 1)$  respectively, and  $\tilde{L} = \log L$  and  $\tilde{U} = \log U$ :

$$\begin{aligned} \text{Survival-AUPRC}(F_{\text{LN}(\mu, \sigma^2)}, L, U) &= \int_0^1 [F_{\text{LN}(\mu, \sigma^2)}(U/t) - F_{\text{LN}(\mu, \sigma^2)}(Lt)] dt \\ &= \int_0^1 [F_{\mathcal{N}(\mu, \sigma^2)}(\tilde{U} - \log t) - F_{\mathcal{N}(\mu, \sigma^2)}(\tilde{L} + \log t)] dt \\ \text{(substituting } s = \log t) &= \int_{-\infty}^0 [F_{\mathcal{N}(\mu, \sigma^2)}(\tilde{U} - s) - F_{\mathcal{N}(\mu, \sigma^2)}(\tilde{L} + s)] e^s ds \\ &= [F_{\mathcal{N}(\mu, \sigma^2)}(\tilde{U} - s) - F_{\mathcal{N}(\mu, \sigma^2)}(\tilde{L} + s)] e^s \Big|_{s=-\infty}^{s=0} \\ &\quad - \int_{-\infty}^0 [-f_{\mathcal{N}(\mu, \sigma^2)}(\tilde{U} - s) - f_{\mathcal{N}(\mu, \sigma^2)}(\tilde{L} + s)] e^s ds \\ &= (F_{\mathcal{N}(\mu, \sigma^2)}(\tilde{U}) - F_{\mathcal{N}(\mu, \sigma^2)}(\tilde{L})) \\ &\quad + \int_{-\infty}^0 [f_{\mathcal{N}(\mu, \sigma^2)}(\tilde{U} - s) + f_{\mathcal{N}(\mu, \sigma^2)}(\tilde{L} + s)] e^s ds \\ &= (F_{\mathcal{N}(\mu, \sigma^2)}(\tilde{U}) - F_{\mathcal{N}(\mu, \sigma^2)}(\tilde{L})) \\ &\quad + \int_{-\infty}^0 f_{\mathcal{N}(\mu, \sigma^2)}(\tilde{U} - s) e^s ds + \int_{-\infty}^0 f_{\mathcal{N}(\mu, \sigma^2)}(\tilde{L} + s) e^s ds \\ &= (F_{\mathcal{N}(\mu, \sigma^2)}(\tilde{U}) - F_{\mathcal{N}(\mu, \sigma^2)}(\tilde{L})) \\ &\quad + \int_{-\infty}^0 \frac{1}{\sigma} \phi\left(\frac{\tilde{U} - s - \mu}{\sigma}\right) e^s ds + \int_{-\infty}^0 \frac{1}{\sigma} \phi\left(\frac{\tilde{L} + s - \mu}{\sigma}\right) e^s ds \\ \left(\text{substituting } u = \frac{\tilde{U} - s - \mu}{\sigma}\right) &= (F_{\mathcal{N}(\mu, \sigma^2)}(\tilde{U}) - F_{\mathcal{N}(\mu, \sigma^2)}(\tilde{L})) \end{aligned}$$

$$\begin{aligned}
& + \int_{-\infty}^{\frac{\tilde{U}-\mu}{\sigma}} \frac{1}{\sigma} \phi(u) e^{\tilde{U}-\sigma u-\mu}(-\sigma) du + \int_{-\infty}^0 \frac{1}{\sigma} \phi\left(\frac{\tilde{L}+s-\mu}{\sigma}\right) e^s ds \\
\left(\text{substituting } v = \frac{\tilde{L}+s-\mu}{\sigma}\right) & = \left(F_{\mathcal{N}(\mu,\sigma^2)}(\tilde{U}) - F_{\mathcal{N}(\mu,\sigma^2)}(\tilde{L})\right) \\
& + \int_{-\infty}^{\frac{\tilde{U}-\mu}{\sigma}} \frac{1}{\sigma} \phi(u) e^{\tilde{U}-\sigma u-\mu}(-\sigma) du + \int_{-\infty}^{\frac{\tilde{L}-\mu}{\sigma}} \frac{1}{\sigma} \phi(v) e^{v\sigma-\tilde{L}+\mu} \sigma dv \\
& = \left(F_{\mathcal{N}(\mu,\sigma^2)}(\tilde{U}) - F_{\mathcal{N}(\mu,\sigma^2)}(\tilde{L})\right) \\
& - e^{\tilde{U}-\mu} \int_{-\infty}^{\frac{\tilde{U}-\mu}{\sigma}} \phi(u) e^{-\sigma u} du + e^{-\tilde{L}+\mu} \int_{-\infty}^{\frac{\tilde{L}-\mu}{\sigma}} \phi(v) e^{v\sigma} dv \\
\left(\text{using } \int e^{cx} \phi(x) dx = e^{\frac{c^2}{2}} \Phi(x-c)\right) & = \left(F_{\mathcal{N}(\mu,\sigma^2)}(\tilde{U}) - F_{\mathcal{N}(\mu,\sigma^2)}(\tilde{L})\right) \\
& + \frac{U}{e^\mu} \left[e^{\frac{\sigma^2}{2}} \Phi(u+\sigma)\right]_{u=-\infty}^{u=\frac{\tilde{U}-\mu}{\sigma}} + \frac{e^\mu}{L} \left[e^{\frac{\sigma^2}{2}} \Phi(v-\sigma)\right]_{v=-\infty}^{v=\frac{\tilde{L}-\mu}{\sigma}} \\
& = \left(F_{\mathcal{N}(\mu,\sigma^2)}(\tilde{U}) - F_{\mathcal{N}(\mu,\sigma^2)}(\tilde{L})\right) \\
& + \frac{U}{e^\mu} \left[e^{\frac{\sigma^2}{2}} \Phi\left(\frac{\tilde{U}-\mu}{\sigma} + \sigma\right) - e^{\frac{\sigma^2}{2}}\right] + \frac{e^\mu}{L} \left[e^{\frac{\sigma^2}{2}} \Phi\left(\frac{\tilde{L}-\mu}{\sigma} - \sigma\right)\right] \\
& = \left(F_{\mathcal{N}(\mu,\sigma^2)}(\tilde{U}) - F_{\mathcal{N}(\mu,\sigma^2)}(\tilde{L})\right) \\
& + e^{\frac{\sigma^2}{2}} \left[\frac{e^\mu}{L} \Phi\left(\frac{\tilde{L}-\mu}{\sigma} - \sigma\right) + \frac{U}{e^\mu} \left(1 - \Phi\left(\frac{\tilde{U}-\mu}{\sigma} + \sigma\right)\right)\right] \\
& = \Phi_{\mu,\sigma^2}(\log U) - \Phi_{\mu,\sigma^2}(\log L) \\
& + e^{\frac{\sigma^2}{2}} \left[\frac{e^\mu}{L} \Phi\left(\frac{\log L - \mu}{\sigma} - \sigma\right) + \frac{U}{e^\mu} \Phi\left(-\frac{\log U - \mu}{\sigma} - \sigma\right)\right].
\end{aligned}$$

### E. SURVIVAL-AUPRC FOR LOG-NORMAL (RIGHT-CENSORED)

For a general continuous prediction distribution  $F$  with an interval outcome  $[L, \infty)$ , we define Survival-AUPRC as

$$\text{Survival-AUPRC}(F, L) = \int_0^1 [1 - F(Lt)] dt.$$

Specifically for the case of log-normal, where  $\Phi$  is the CDF of  $\mathcal{N}(0, 1)$ , and  $\tilde{L} = \log L$  (following Appendix-D),

$$\text{Survival-AUPRC}(F_{\text{LN}(\mu,\sigma^2)}, L) = \int_0^1 [1 - F_{\text{LN}(\mu,\sigma^2)}(Lt)] dt = 1 - \Phi_{\mu,\sigma^2}(\tilde{L}) + \frac{e^{\mu+\frac{\sigma^2}{2}}}{L} \Phi\left(\frac{\tilde{L}-\mu}{\sigma} - \sigma\right).$$

### F. SURVIVAL-AUPRC FOR LOG-NORMAL (UNCENSORED)

For a general continuous prediction distribution  $F$  with a point outcome  $y$ , we define Survival-AUPRC

$$\text{Survival-AUPRC}(F, y) = \int_0^1 [F(y/t) - F(yt)] dt.$$

Specifically for the case of log-normal, where  $\Phi$  is the CDF of  $\mathcal{N}(0, 1)$ , and  $\tilde{y} = \log y$  (following Appendix-D),

$$\begin{aligned}
\text{Survival-AUPRC}(F_{\text{LN}(\mu,\sigma^2)}, y) & = \int_0^1 [F_{\text{LN}(\mu,\sigma^2)}(y/t) - F_{\text{LN}(\mu,\sigma^2)}(yt)] dt \\
& = e^{\frac{\sigma^2}{2}} \left[\frac{e^\mu}{y} \Phi\left(\frac{\tilde{y}-\mu}{\sigma} - \sigma\right) + \frac{y}{e^\mu} \Phi\left(-\frac{\tilde{y}-\mu}{\sigma} - \sigma\right)\right].
\end{aligned}$$

## G. EVALUATION AS BINARY OUTCOME

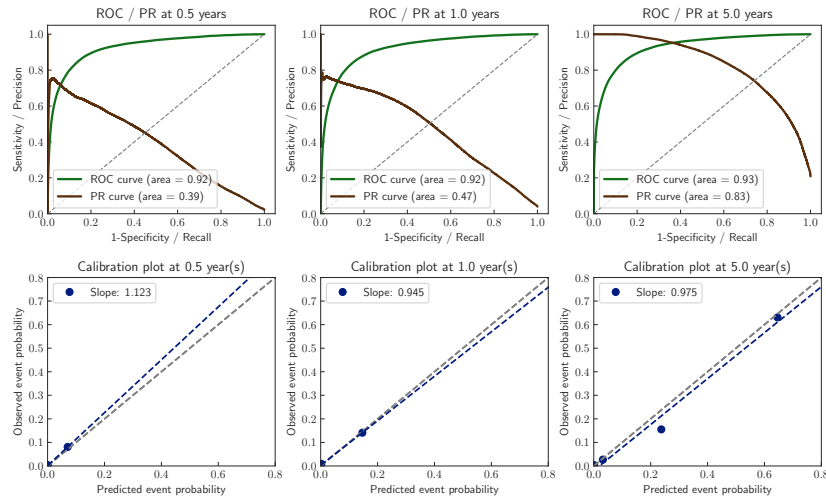

Figure 6: Discrimination and calibration of predictions from the interval-censored Survival-CRPS model, evaluated as predictions for a dichotomous outcome at 6 months, 1 year, and 5 years.

## H. INDIVIDUAL PATIENTS IN INTERVAL-CENSORED SURVIVAL-CRPS MODEL

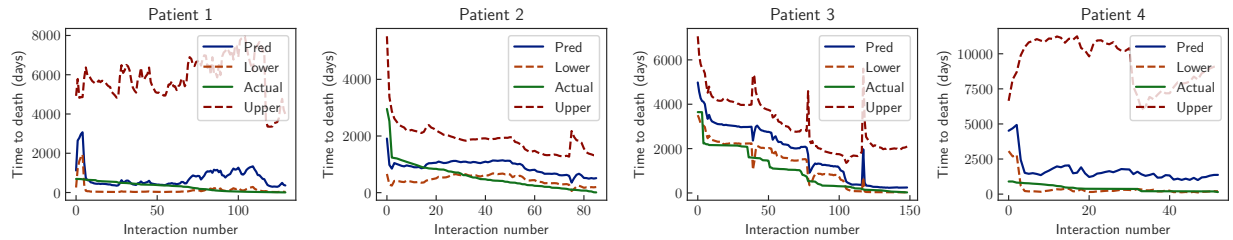

Figure 7: Median predicted time to death (with 95% intervals) for individual patients from the interval-censored Survival-CRPS model. Our model gives more confident predictions upon repeated interactions between patients and the EHR. True times to death generally lie within predicted intervals.
